# Supplementary material for: A novel pyrazoline-based selective fluorescent probe for detecting reduced glutathione and its application in living cells and serum
Source: Royal Society of Chemistry journal article supplement (doi:10.1039/c3an01440a), 2013-01-01
Supplement: c3an01440a.pdf [file c3an01440a.pdf]

## Supplementary data

### Novel pyrazoline-based selective fluorescent sensor for detecting reduced glutathione and its application in cells

Sheng-Qing Wang<sup>a</sup>, Qing-Hua Wu<sup>b</sup> Hao-Yan Wang<sup>a</sup>, Xiao-Xin Zheng<sup>a</sup>, Shi-Li Shen<sup>a</sup>,

Yan-Ru Zhang<sup>a</sup>, Bao-Xiang Zhao<sup>a\*</sup> and Jun-Ying Miao<sup>b\*</sup>

<sup>a</sup>*Institute of Organic Chemistry, School of Chemistry and Chemical Engineering, Shandong University, Jinan 250100, P.R. China*

<sup>b</sup>*Institute of Developmental Biology, School of Life Science, Shandong University, Jinan 250100, P.R. China*

#### Table of Contents

- 1. Fig. S-1** Fluorescence spectra of probe **3** (10 μM) and probe **3** + Cys (100 M) in different ratios of CH<sub>3</sub>CN/H<sub>2</sub>O solution at pH 7.4 (10 mM PBS buffer) ..... 3
- 2. Fig. S-2** The <sup>1</sup>H NMR spectra of probe **3** (in DMSO-*d*<sub>6</sub>) in the presence of different concentrations of Cys and the ratio of Cys to **3** is 0, 0.5, 1.0 and 2.0 respectively. ....3
- 3. Fig. S-3** Fluorescence spectra of probe **3** (10 μM) in a buffer solution (10 mM PBS

---

\* Corresponding authors. Tel.: +86 531 88366425; fax: +86 531 88564464;  
e-mail addresses: [bxzhao@sdu.edu.cn](mailto:bxzhao@sdu.edu.cn) and [miaojy@sdu.edu.cn](mailto:miaojy@sdu.edu.cn)

- buffer, pH 7.4) after the addition of Cys, GSH, mercaptoacetic acid, (each 100  $\mu\text{M}$ ) and Cys, GSH, mercaptoacetic acid with *N*-ethylmaleimide, (1 mM) for 12 h. ....4
- 4. Fig. S-4** Photographs of the tested samples after addition of amino acid,  $\text{K}^+$ ,  $\text{Ca}^{2+}$ ,  $\text{Na}^+$ ,  $\text{Mg}^{2+}$ ,  $\text{Fe}^{3+}$  and  $\text{Zn}^{2+}$  taken by irradiating the samples with a UV lamp at 365 nm. ....4
- 5. Fig. S-5** Fluorescence responses of **3** (10  $\mu\text{M}$ ) to various analytes. Red bars display fluorescence intensity of the products of **3** (10  $\mu\text{M}$ ) reacted with Cys (100  $\mu\text{M}$ ) in the presence of other amino acids and metal ions (100  $\mu\text{M}$ ). The black bars display the fluorescence intensities of the products of **3** (10  $\mu\text{M}$ ) reacted with GSH (100  $\mu\text{M}$ ) in the presence of other amino acids and metal ions(100  $\mu\text{M}$ ); blue bars display the fluorescence intensities of **3** (10  $\mu\text{M}$ ) in the presence of different amino acids and metal ions (100  $\mu\text{M}$ ), respectively. ....5
- 6. Fig. S-6** Fluorescence spectra (10  $\mu\text{M}$ ) of probe **3** recorded upon addition of Cys (0-600 equiv.) in a buffer solution (10 mM PBS buffer, pH 7.4). The individual spectra were recorded after incubation of probe **3** with Cys for 24 h. Excitation wavelength was 370 nm (slit = 15.0/2.5). Inset: Linear regression equation of probe **3** (10  $\mu\text{M}$ ) upon addition of Cys (2-18 equiv.), in  $\text{CH}_3\text{CN}/\text{H}_2\text{O}$  (3:7, v/v),  $R = 0.99805$  ( $I_{464}$ ). . ....5
- 7. Fig. S-7** Time-dependent changes in the fluorescence intensity ( $I_{464}$ ) of probe **3** (10  $\mu\text{M}$ ) observed upon addition of Cys (100  $\mu\text{M}$ ) in  $\text{CH}_3\text{CN}/\text{H}_2\text{O}$  (3:7, v/v). All experiments were performed at room temperature. ....6
- 8. Fig. S-8** Fluorescence intensity (464 nm) of free probe **3** (10  $\mu\text{M}$ ) and probe **3** + 10 equiv. of GSH in a mixture of  $\text{CH}_3\text{CN}/\text{H}_2\text{O}$  (3:7, v/v) with different pH conditions. ....6
- 9. Fig. S-9** Fluorescence intensity (464 nm) of free probe **3** (10  $\mu\text{M}$ ) and probe **3** + 10 equiv. of Cys in a mixture of  $\text{CH}_3\text{CN}/\text{H}_2\text{O}$  (3:7, v/v) with different pH conditions. ....7

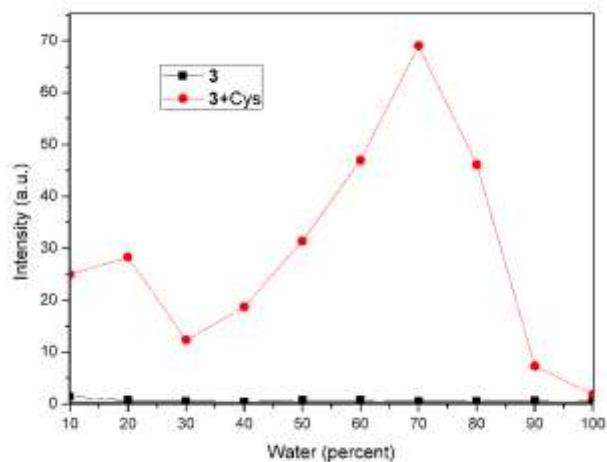

**Fig. S-1** Fluorescence spectra of probe **3** (10  $\mu$ M) and probe **3** + Cys (100 M) in different ratios of CH<sub>3</sub>CN/H<sub>2</sub>O solution at pH 7.4 (10 mM PBS buffer)

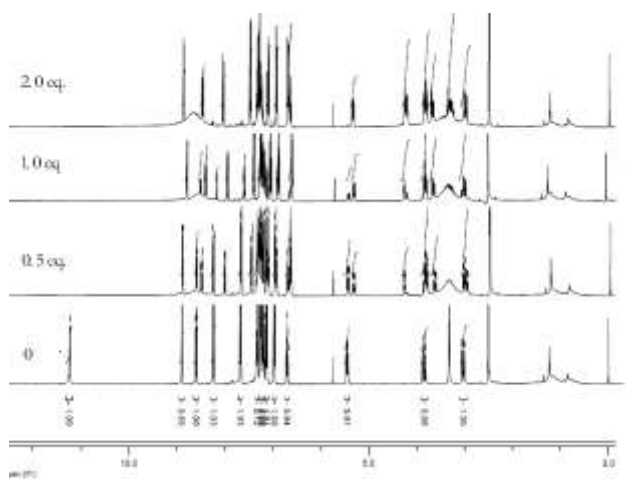

**Fig. S-2** The <sup>1</sup>H NMR spectra of probe **3** (in DMSO-*d*<sub>6</sub>) in the presence of different concentrations of Cys and the ratio of Cys to **3** is 0, 0.5, 1.0 and 2.0 respectively.

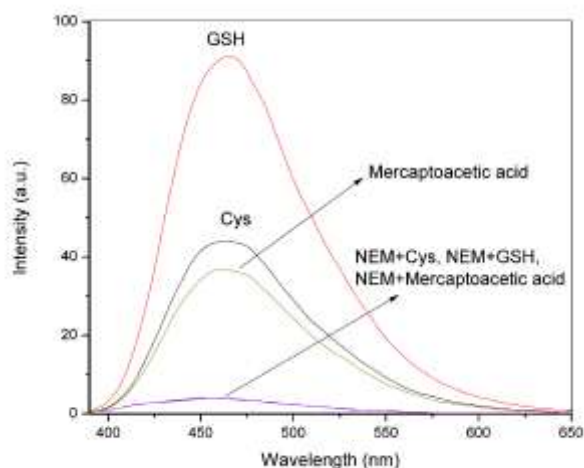

**Fig. S-3** Fluorescence spectra of probe **3** (10  $\mu\text{M}$ ) in a buffer solution (10 mM PBS buffer, pH 7.4) after the addition of Cys, GSH, mercaptoacetic acid, (each 100  $\mu\text{M}$ ) and Cys, GSH, mercaptoacetic acid with *N*-ethylmaleimide, (1 mM) for 12 h.

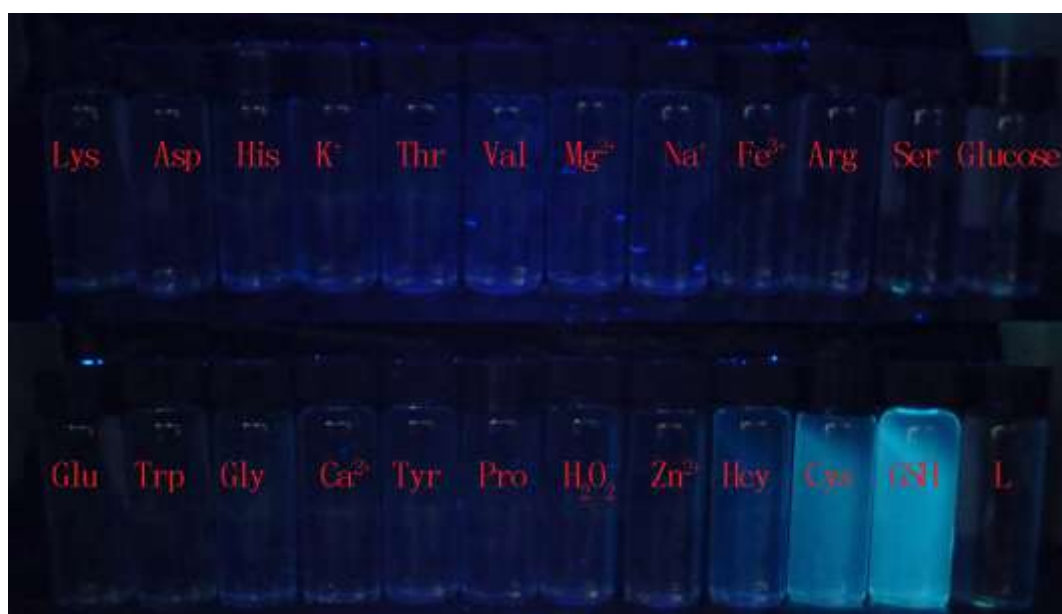

**Fig. S-4** Photographs of the tested samples after addition of amino acid, K<sup>+</sup>, Ca<sup>2+</sup>, Na<sup>+</sup>, Mg<sup>2+</sup>, Fe<sup>3+</sup> and Zn<sup>2+</sup> taken by irradiating the samples with a UV lamp at 365 nm.

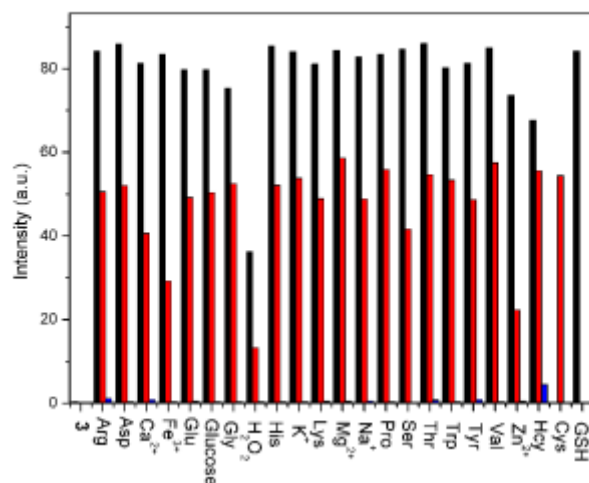

**Fig. S-5** Fluorescence responses of **3** (10  $\mu\text{M}$ ) to various analytes. Red bars display fluorescence intensity of the products of **3** (10  $\mu\text{M}$ ) reacted with Cys (100  $\mu\text{M}$ ) in the presence of other amino acids and metal ions (100  $\mu\text{M}$ ). The black bars display the fluorescence intensities of the products of **3** (10  $\mu\text{M}$ ) reacted with GSH (100  $\mu\text{M}$ ) in the presence of other amino acids and metal ions (100  $\mu\text{M}$ ); blue bars display the fluorescence intensities of **3** (10  $\mu\text{M}$ ) in the presence of different amino acids and metal ions (100  $\mu\text{M}$ ), respectively.

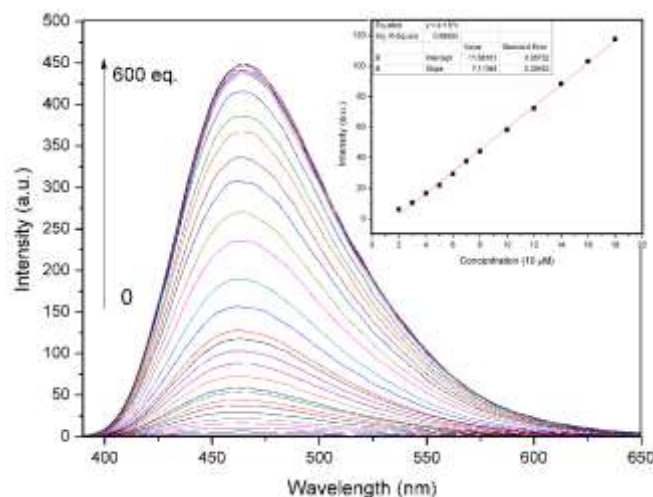

**Fig. S-6** Fluorescence spectra (10  $\mu\text{M}$ ) of probe **3** recorded upon addition of Cys (0-600 equiv.) in a buffer solution (10 mM PBS buffer, pH 7.4). The individual spectra were recorded after incubation of probe **3** with Cys for 24 h. Excitation wavelength was 370 nm (slit = 15.0/2.5). Inset: Linear regression equation of probe **3** (10  $\mu\text{M}$ ) upon addition of Cys (2-18 equiv.), in  $\text{CH}_3\text{CN}/\text{H}_2\text{O}$  (3:7, v/v),  $R = 0.99805$  ( $I_{464}$ ).

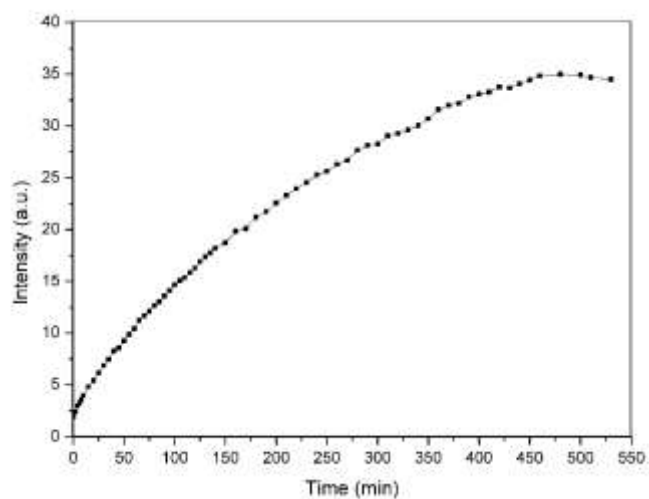

**Fig. S-7** Time-dependent changes in the fluorescence intensity ( $I_{464}$ ) of probe **3** ( $10\ \mu\text{M}$ ) observed upon addition of Cys ( $100\ \mu\text{M}$ ) in  $\text{CH}_3\text{CN}/\text{H}_2\text{O}$  (3:7, v/v). All experiments were performed at room temperature.

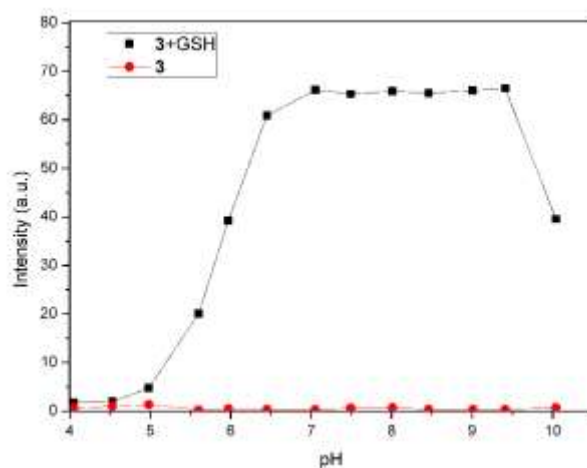

**Fig. S-8** Fluorescence intensity (464 nm) of free probe **3** ( $10\ \mu\text{M}$ ) and probe **3** + 10 equiv. of GSH in a mixture of  $\text{CH}_3\text{CN}/\text{H}_2\text{O}$  (3:7, v/v) with different pH conditions.

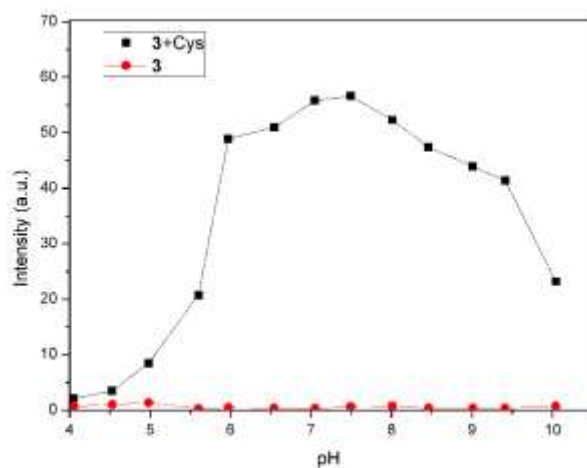

**Fig. S-9** Fluorescence intensity (464 nm) of free probe **3** (10  $\mu$ M) and probe **3** + 10 equiv of Cys in a mixture of  $\text{CH}_3\text{CN}/\text{H}_2\text{O}$  (3:7, v/v) with different pH conditions.
